# Supplementary material for: A novel nickel metal–organic framework with fluorite-like structure: gas adsorption properties and catalytic activity in Knoevenagel condensation
Source: Royal Society of Chemistry journal article supplement (doi:10.1039/c3dt52698d), 2013-12-18
Supplement: c3dt52698d.pdf [file c3dt52698d.pdf]

## Supplementary Information

### Novel nickel metal-organic framework with fluorite-like structure: Gas adsorption properties and catalytic activity in Knoevenagel condensation

Miroslav Almáší<sup>a</sup>, Vladimír Zeleňák<sup>\*a</sup>, M. Opanasenko<sup>b</sup>, J. Čejka<sup>\*b</sup>

<sup>a</sup> Department of Inorganic Chemistry, Faculty of Science, Pavol Jozef Šafárik University, Moyzesova 11, 041 54 Košice, Slovak Republic; [vladimir.zelenak@upjs.sk](mailto:vladimir.zelenak@upjs.sk)

<sup>b</sup> Department of Synthesis and Catalysis, J. Heyrovský Institute of Physical Chemistry of the ASCR, v.v.i., Academy of Sciences of the Czech Republic, Dolejškova 2155/3, 128 23 Prague, Czech Republic; [jiri.cejka@jh-inst.cas.cz](mailto:jiri.cejka@jh-inst.cas.cz)

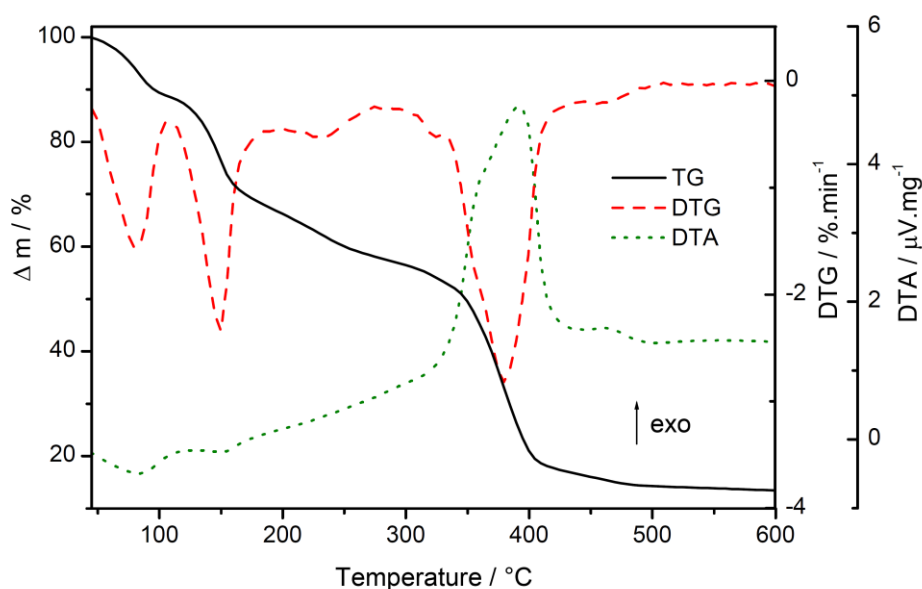

**Figure S1.** TG/DTG-DTA curves of **1** measured in atmosphere of air.

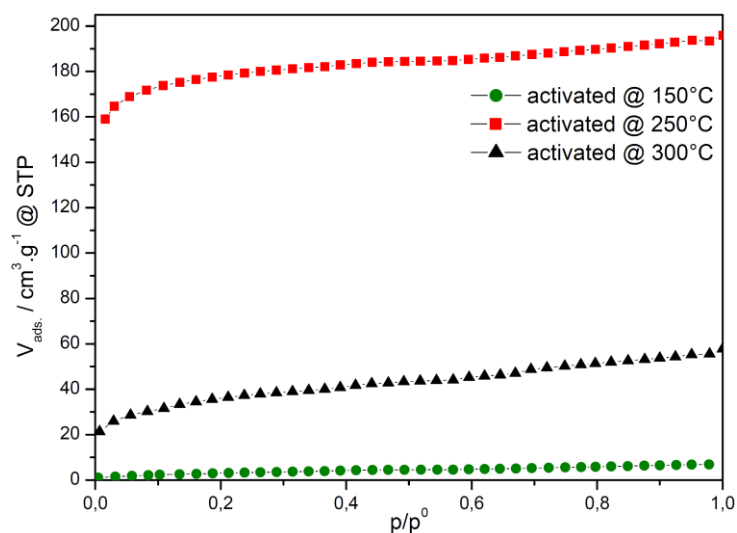

**Figure S2.** Nitrogen adsorption isotherms of **1** measured after activation of the sample at: 150°C (green circles), 250°C (red squares), 300°C (black triangles).

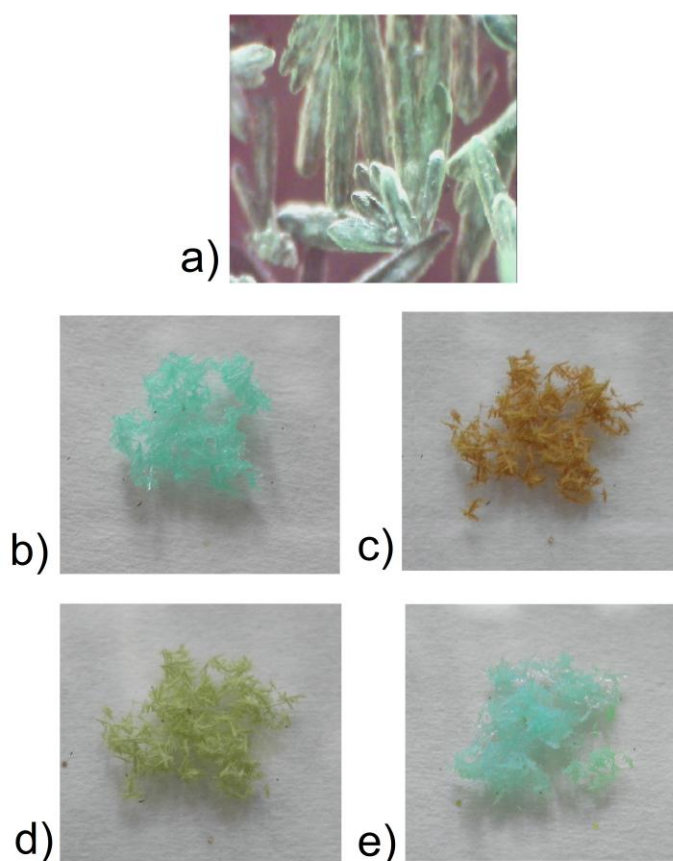

**Figure S3** Optical microscopy images of as synthesized sample **1** a) 5 x zoom, b) 2 x zoom. Microscopy images of **1** activated at 250°C (c); after 5-minute explosion at room temperature and ambient humidity (d); sample after resolvation in a solvent mixture DMF/EtOH/H<sub>2</sub>O (1:1:1) (solvatochromism).
